# Supplementary material for: Impact of Peptide Structure on Colonic Stability and Tissue Permeability
Source: MDPI journal article supplement (doi:10.3390/pharmaceutics15071956), 2023-07-15
Supplement: s1 [file s1]

Table S1. The degradation rate constants and half-lives of peptides in the Human Colon Model (HCM) when fitted to an exponential decay model. NC: not computable, as P1 and P9 were entirely depleted between 0.0 - 0.5 hr. \*P5 did not fit to the exponential decay model as it was highly stable in the HCM.

| Peptide  | Goodness of fit to first order degradation ( $R^2$ ) | Degradation rate constant (% peptide/hour) | Half-life (hours) |
|----------|------------------------------------------------------|--------------------------------------------|-------------------|
| Oxytocin | 0.9952                                               | 1.620                                      | 0.4278            |
| P1       | NC                                                   | NC                                         | NC                |
| P2       | 0.9964                                               | 3.173                                      | 0.2184            |
| P3       | 0.9950                                               | 0.6880                                     | 1.007             |
| P4       | 0.8720                                               | 0.1081                                     | 6.414             |
| P5       | 0.4934*                                              | 0.03220                                    | 21.52             |
| P6       | 0.9998                                               | 5.395                                      | 0.1285            |
| P7       | 0.9975                                               | 1.050                                      | 0.6604            |
| P8       | 0.9997                                               | 2.333                                      | 0.2971            |
| P9       | NC                                                   | NC                                         | NC                |
| P10      | 0.9949                                               | 2.052                                      | 0.3377            |
| P11      | 0.9529                                               | 0.2893                                     | 2.396             |

Table S2. The apparent permeabilities ( $P_{app}$ ) of the peptides tested in the Ussing chamber model, using rat colonic tissue.

| Peptide  | Time (min) | $P_{app}$ (cm/s)      |
|----------|------------|-----------------------|
| Oxytocin | 60         | 0.00                  |
|          | 120        | 0.00                  |
| P4       | 60         | $5.7 \times 10^{-5}$  |
|          | 120        | $2.06 \times 10^{-4}$ |
| P7       | 60         | 0.00                  |
|          | 120        | 0.00                  |
| P11      | 60         | $1.20 \times 10^{-5}$ |
|          | 120        | $3.52 \times 10^{-5}$ |
